# Supplementary material for: Molecular Pathways and Key Genes Associated With Breast Width and Protein Content in White Striping and Wooden Breast Chicken Pectoral Muscle
Source: PubMed Central journal article supplement (PMC9304951; doi:10.3389/fphys.2022.936768), 2022-07-08
Supplement: DataSheet1.pdf [file DataSheet1.pdf]

## *Supplementary Material*

### **1 Supplementary Tables captions**

**Supplementary Table S1. Module-trait association values.** The table reports Pearson's correlation coefficients measured between each single module (module eigengene; ME) and considered traits: width (W) and protein content (PC).

**Supplementary Table S2. Gene significance (GS) of genes referred to the considered traits.** The table reports the complete lists of GS values and the relative P-value between all genes and the considered traits: width (W) and protein content (PC).

**Supplementary Table S3. Module Membership (MM) of genes belonging to the yellow2 and turquoise modules.** The table reports the complete lists of gene MM values and the relative *P-values* of all genes belonging to the two considered modules: yellow2 and turquoise.

**Supplementary Table S4. Functional analysis performed using DAVID tools.** The table reports the detailed results of the functional classification of the yellow2 and turquoise modules.

**Supplementary Table S5. Functional analysis performed using ClueGO Cytoscape plugin.** The table reports the functional categories identified by ClueGO for the yellow2 and turquoise modules.
